# Supplementary material for: Gamma-rays induced mutations increase soybean oil and protein contents
Source: PeerJ. 2023 Nov 21;11:e16395. doi: 10.7717/peerj.16395 (PMC10668811; doi:10.7717/peerj.16395)
Supplement: Supplemental Information 1 — Mean performance data for studied traits [file peerj-11-16395-s001.xlsx]

## Sheet: M3 data
Mutant	Rep	Plant height (cm)	First pod height (cm)	No. of branches/plant	No. of pods/plant	No. of seeds/plant	100 seed weight (gm)	Seeds weight (gm)/plant	Oil percentage (%)	Protein content (%)
Giza-21	1	63	13	2	25	68	11.5	5.5	18.42	31.76
G21-HNP-1	1	65	13	4	61	160	12.4	17.9	17.87	35.25
G21-HNP-2	1	60	16	4	92	250	14.7	24.9	18.5	38
G21-HNS-1	1	73	25	1	30	92	18.4	14	18.2	40.75
G21-HNP-3	1	63	10	2	72	185	12.8	28.9	20.73	32.2
Giza-22	1	72	21	2	27	85	11.1	11.9	18.17	29.94
G22-HNS-1	1	78	19	3	58	143	16.3	21.9	19.59	29.75
G22-HNS-2	1	82	17	4	60	190	14.6	22.3	20.53	30.19
G22-LS-1	1	102	13	1	31	90	11.1	10	17.8	38.13
G22-HNS-3	1	90	13	2	60	170	13.6	20.9	18.5	33.78
Giza-82	1	72	12	2	50	110	14.2	15.9	18.23	29.12
G82-HNP-1	1	88	12	4	85	210	18.4	31.9	21.31	29.75
G82-D-1	1	55	14	3	70	179	13.1	22.1	25.7	29.1
G82-HNS-1	1	63	11	4	96	251	10.5	28.4	22.12	31.41
G82-HNS-2	1	83	14	5	65	164	13.1	22.9	19.29	35
G82-HNP-2	1	82	13	3	80	180	14.7	23.6	21.28	32.29
Giza-83	1	62	15	3	41	73	13.3	8.7	17.32	31.17
G83-HNS-1	1	87	13	3	85	260	14.2	35.1	18.74	36.88
G83-SD-1	1	43	11	4	85	154	15.3	20.2	19.46	31.6
G83-HNP-1	1	83	12	4	76	173	16.8	26.4	17.2	36.91
line-117	1	62	15	2	33	88	9.7	7.4	15.46	31.38
H117-HNS-1	1	102	11	3	120	250	13	29.5	23.37	41.81
H117-HNS-2	1	73	15	4	114	300	17.3	49.2	19.5	36.6
H117-HNS-3	1	94	23	4	82	252	12.8	26.8	14.81	37.8
H117-HNP-1	1	74	17	5	113	220	11.1	22.9	16.05	43.31
Giza-21	2	65	11	2	26	77	9.1	5.1	17.3148	29.8544
G21-HNP-1	2	57	14	3	58	150	12.6	19.6	16.2978	33.135
G21-HNP-2	2	58	14	2	98	274	13.4	24.4	17.39	35.32
G21-HNS-1	2	76	22	2	36	84	17.8	14.3	17.108	38.305
G21-HNP-3	2	62	13	2	85	195	13.4	29.4	19.1862	30.268
Giza-22	2	73	16	3	33	90	12.8	11.2	17.0798	28.1436
G22-HNS-1	2	83	21	2	70	144	15.2	21.2	18.4146	27.965
G22-HNS-2	2	83	23	2	65	161	14.6	22.9	19.2982	28.3786
G22-LS-1	2	104	15	2	34	91	13.2	11.1	16.732	35.4422
G22-HNS-3	2	94	12	4	65	162	13.9	20.9	17.29	31.7532
Giza-82	2	72	14	3	42	115	15.5	15.2	17.1362	27.3728
G82-HNP-1	2	82	10	3	91	212	15.8	31.2	20.0314	27.965
G82-D-1	2	58	12	2	73	173	13.8	22.2	24.158	27.354
G82-HNS-1	2	68	14	4	98	265	11.9	28.6	20.7928	29.5254
G82-HNS-2	2	78	10	5	70	170	12.6	22.6	18.1326	32.9
G82-HNP-2	2	73	12	3	76	185	15.1	22.2	20.0032	30.3526
Giza-83	2	58	14	2	30	67	13.8	8.7	16.2808	29.4998
G83-HNS-1	2	90	15	4	98	265	13.9	35.4	17.6156	34.6672
G83-SD-1	2	48	12	2	74	149	15.6	20.7	18.5924	29.704
G83-HNP-1	2	75	13	2	68	170	16.8	26.4	16.168	34.6954
line-117	2	63	17	1	32	75	10.7	7.3	14.5324	29.4972
H117-HNS-1	2	103	15	5	123	247	13.1	29.1	21.9678	39.3014
H117-HNS-2	2	78	16	5	119	305	17.1	49.9	18.43	34.404
H117-HNS-3	2	89	22	3	88	249	11.3	26	13.9214	35.532
H117-HNP-1	2	68	15	3	110	225	12.8	22.5	15.087	40.7114
Giza-21	3	67	13	2	28	66	11	6.3	19.5252	33.6656
G21-HNP-1	3	67	21	3	56	142	17.7	22	18.9422	37.565
G21-HNP-2	3	53	11	3	91	233	13.6	24.6	19.21	40.28
G21-HNS-1	3	72	20	2	37	94	16	14.7	19.292	43.195
G21-HNP-3	3	65	10	3	70	191	14.3	29.6	21.9738	34.132
Giza-22	3	77	14	2	29	86	10.9	11.6	19.2602	31.7364
G22-HNS-1	3	83	23	2	58	164	12.6	22.9	20.7654	31.535
G22-HNS-2	3	74	18	3	57	175	16.5	21.8	21.7618	32.4014
G22-LS-1	3	102	17	3	36	82	12.7	10.4	18.868	40.4178
G22-HNS-3	3	93	13	2	55	165	13.4	19.7	19.61	35.8068
Giza-82	3	74	10	2	48	117	12.8	14.9	19.3238	30.8672
G82-HNP-1	3	84	10	4	89	215	15.7	31.1	22.5886	31.435
G82-D-1	3	53	11	2	74	170	13.6	22.7	27.542	30.846
G82-HNS-1	3	72	13	5	90	260	12.3	28	23.4472	33.2946
G82-HNS-2	3	81	14	3	78	160	13.2	23.6	20.4474	37.1
G82-HNP-2	3	78	15	4	85	182	14.9	23.8	22.5568	34.2274
Giza-83	3	64	12	2	35	64	13.2	9.4	18.3592	33.4402
G83-HNS-1	3	92	13	4	90	255	14.8	35.5	19.8644	39.0928
G83-SD-1	3	42	12	3	80	145	14.4	20.3	20.6276	33.496
G83-HNP-1	3	85	10	3	74	176	16.1	26.5	18.532	39.1246
line-117	3	64	15	1	35	87	10	8.1	16.3876	33.2628
H117-HNS-1	3	99	12	3	115	245	13.2	29.9	24.7722	44.3186
H117-HNS-2	3	74	13	5	117	295	16.9	49.1	20.87	38.796
H117-HNS-3	3	93	21	4	96	256	11.4	26.5	15.6986	40.068
H117-HNP-1	3	62	15	4	106	215	10.5	22.6	17.013	45.9086
